# Supplementary material
Source: Springer Nature journal article supplement (https://www.springermedizin.de/resource/supplementary/12889_2008_1381_MOESM2_ESM.pdf/9503088)

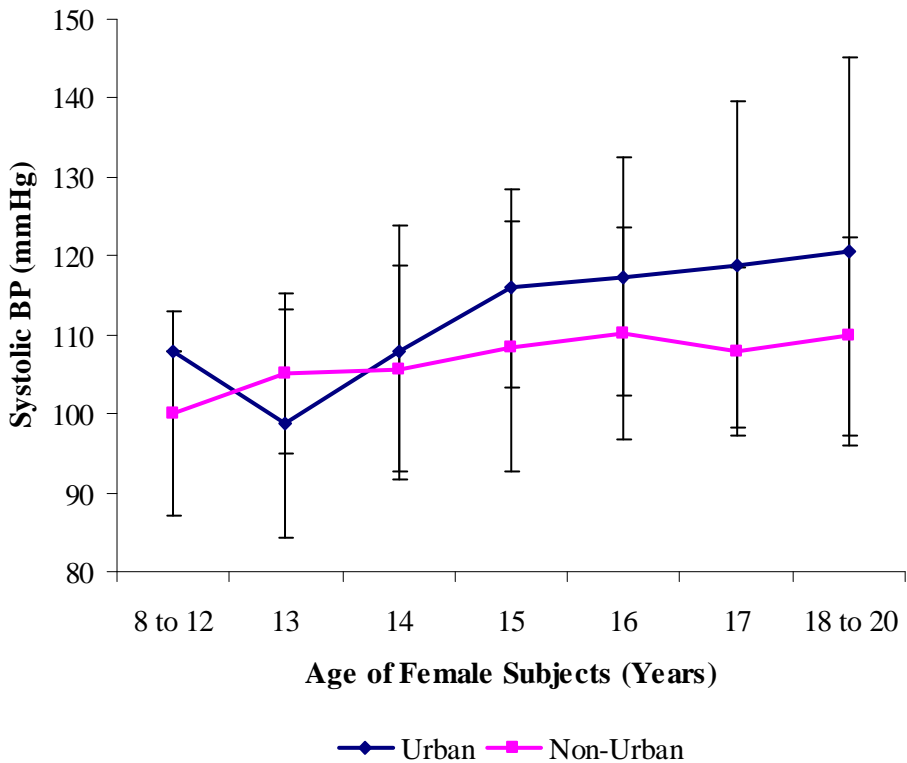

BP represents blood pressure

Supplement: MOESM2 [file 9503088]
